# Supplementary material
Source: publisher figshare collection journal article supplement (https://frontiersin.figshare.com/ndownloader/files/25607177)
Supplement: Supplementary file [file 25607177]

**Table 01.** Antibodies used for WB experiments.

| Antibody                        | Company                     | Catalog # | Type      | Class      | Source | Reactivity            |
|---------------------------------|-----------------------------|-----------|-----------|------------|--------|-----------------------|
| ARHGAP21 (H-300)                | Santa Cruz                  | SC98336   | Primary   | Polyclonal | Rabbit | Mouse, Rat, and Human |
| GAPDH (FL-335)                  | Santa Cruz                  | SC25778   | Primary   | Polyclonal | Rabbit | Mouse, Rat, and Human |
| Goat anti-Rabbit IgG (H+L), HRP | Thermo<br>Fisher/Invitrogen | 31460     | Secondary | Polyclonal | Goat   | Rabbit                |
